# Supplementary material
Source: Springer Nature journal article supplement (https://www.springermedizin.de/resource/supplementary/12936_2011_1991_MOESM3_ESM.pdf/9542114)

■ Rainfall - \* - An. funestus - □ - An. gambiae s.l

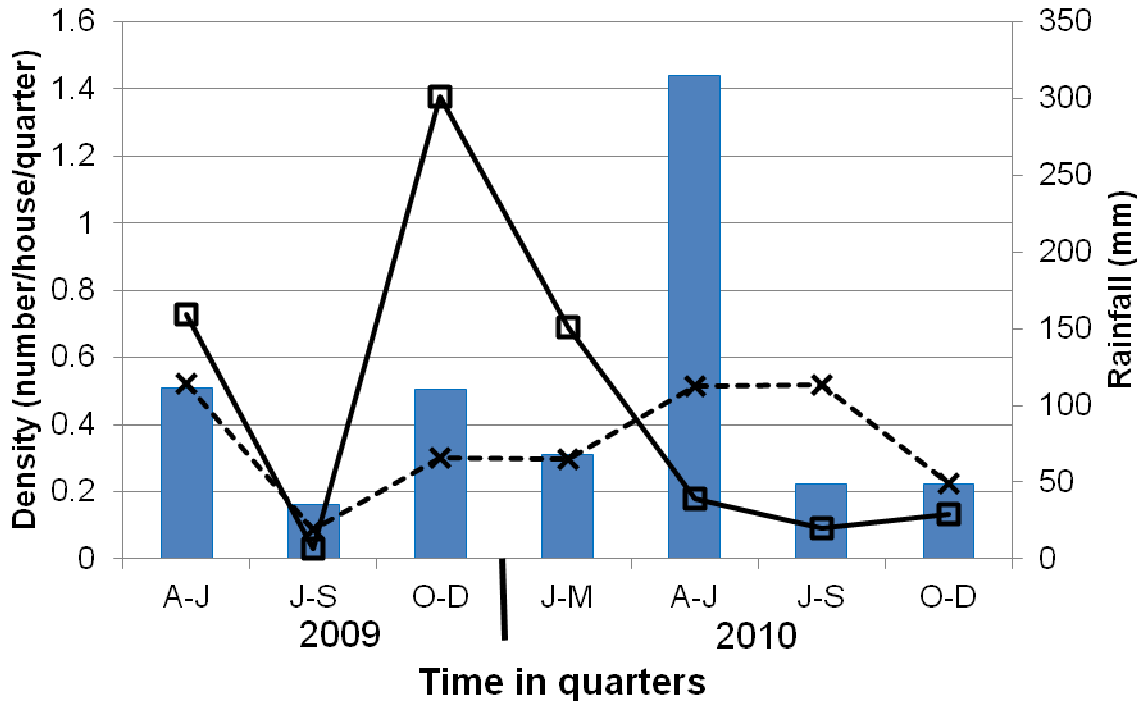

Supplement: MOESM3 [file 9542114]
